# Supplementary material for: A multi-trait Bayesian method for mapping QTL and genomic prediction
Source: PubMed Central journal article supplement (PMC5866527; doi:10.1186/s12711-018-0377-y), 2018-03-24
Supplement: 12711_2018_377_MOESM1_ESM.pdf [file 12711_2018_377_MOESM1_ESM.pdf]

**Table S1.** Phenotypic (above diagonal,  $\sigma_{P_1.P_2}^2 / \sqrt{\sigma_{P_1}^2 \sigma_{P_2}^2}$ ) and genetic (below diagonal,  $\sigma_{a_1.a_2}^2 / \sqrt{\sigma_{a_1}^2 \sigma_{a_2}^2}$ ) correlation between traits for milk yield traits, with trait heritability (diagonal,  $\sigma_{a_1}^2 / \sigma_{P_1}^2$ ) from the multi-trait model [where  $\sigma_{a_1}^2$  (or  $\sigma_{a_1.a_2}^2$ ) represents the genetic variance for trait 1 (or covariance between traits 1 and 2) and similarly  $\sigma_{P_1}^2$  ( $\sigma_{P_1.P_2}^2$ ) represents the phenotypic variance (or covariance) for the traits]. Standard errors for the estimates are shown in brackets.

|                    | FY   |         | MY   |         | PY   |         |
|--------------------|------|---------|------|---------|------|---------|
| fat yield (FY)     | 0.46 | (0.013) | 0.55 | (0.006) | 0.67 | (0.005) |
| milk yield (MY)    | 0.32 | (0.014) | 0.56 | (0.014) | 0.88 | (0.002) |
| protein yield (PY) | 0.53 | (0.012) | 0.81 | (0.005) | 0.49 | (0.013) |
