# Supplementary material for: A multi-trait Bayesian method for mapping QTL and genomic prediction
Source: PubMed Central journal article supplement (PMC5866527; doi:10.1186/s12711-018-0377-y), 2018-03-24
Supplement: 12711_2018_377_MOESM2_ESM.pdf [file 12711_2018_377_MOESM2_ESM.pdf]

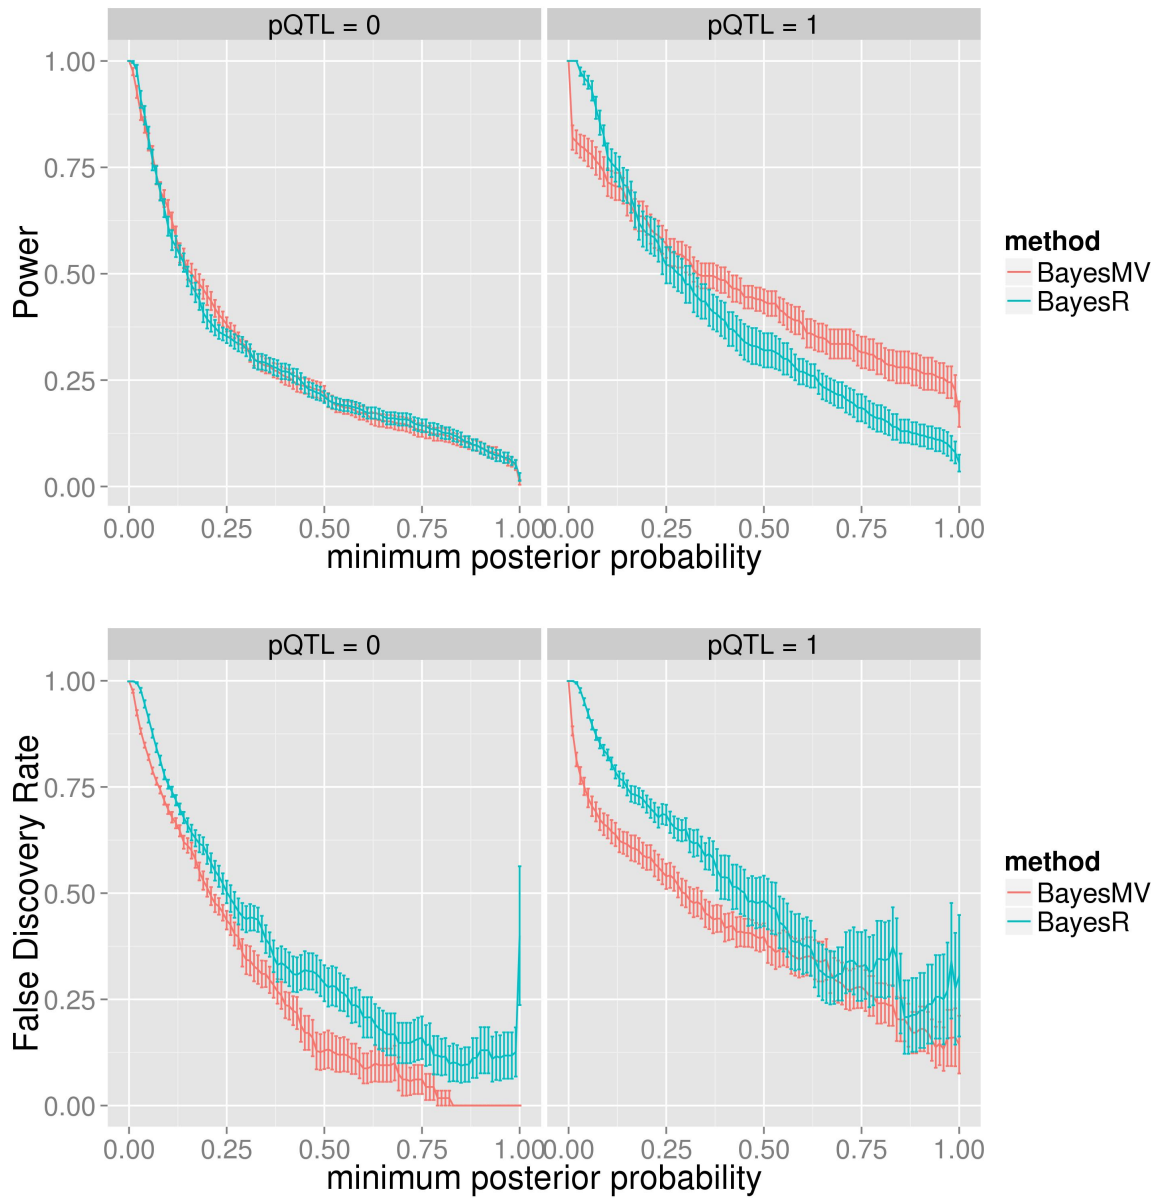

**Figure S1.** Mean power (top) and false-discovery rate (bottom) for QTL discovery in simulated data for a single trait. Analysis methods were either univariate (BayesR) or multi-variate (BayesMV), where there was either no pleiotropic QTL (pQTL = 0, left) or complete pleiotropy (pQTL = 1, right). Error bars indicate the standard error of the mean for 20 replicates.
