# Supplementary material for: A multi-trait Bayesian method for mapping QTL and genomic prediction
Source: PubMed Central journal article supplement (PMC5866527; doi:10.1186/s12711-018-0377-y), 2018-03-24
Supplement: 12711_2018_377_MOESM3_ESM.pdf [file 12711_2018_377_MOESM3_ESM.pdf]

**Table S2.** Posterior mean number of SNP in each distribution [0, 0.0001, 0.001 or 0.01 of the pedigree estimated genetic variance ( $\sigma_{a^*}^2$ )]. Data from Kemper et. al. [1].

| Reference dataset | $\sigma_{a^*}^2$ | Fat yield (FY) | Milk yield (MY) | Protein yield (PY) |
|-------------------|------------------|----------------|-----------------|--------------------|
| Hol_Jer           | 0                | 627,584        | 627,787         | 627,377            |
|                   | 0.0001           | 4389           | 4155            | 4583               |
|                   | 0.001            | 23             | 54              | 37                 |
|                   | 0.01             | 6              | 6               | 5                  |
| Holstein          | 0                | 627,973        | 628,084         | 627,605            |
|                   | 0.0001           | 3968           | 3834            | 4352               |
|                   | 0.001            | 53             | 78              | 40                 |
|                   | 0.01             | 7              | 6               | 5                  |
| Jersey            | 0                | 628,048        | 628,967         | 628,454            |
|                   | 0.0001           | 3897           | 2960            | 3469               |
|                   | 0.001            | 49             | 68              | 73                 |
|                   | 0.01             | 8              | 6               | 6                  |
