# Supplementary material for: A multi-trait Bayesian method for mapping QTL and genomic prediction
Source: PubMed Central journal article supplement (PMC5866527; doi:10.1186/s12711-018-0377-y), 2018-03-24
Supplement: 12711_2018_377_MOESM4_ESM.pdf [file 12711_2018_377_MOESM4_ESM.pdf]

**Table S3.** Top 100 SNP with the highest mean posterior probability (PP) for inclusion in the model from the Holstein/Jersey reference population using BayesMV. Shading indicates grouping of the QTLs according to their direction of effects on each of the traits; either fat (FY), milk (MY) or protein (PY) yield#.

| SNP name           | BTA | position (bp) | PProb | FY  | MY | PY  | Candidate gene |
|--------------------|-----|---------------|-------|-----|----|-----|----------------|
| BovineHD0100011295 | 1   | 39389202      | 0.71  | -   | -  | -   |                |
| BovineHD4100000422 | 1   | 73302604      | 0.47  | -   | -  | -   |                |
| BovineHD0100025771 | 1   | 90629428      | 0.47  | +   | -  | -   |                |
| BovineHD0100033516 | 1   | 118736041     | 0.56  | (-) | -  | (-) |                |
| BovineHD0100041639 | 1   | 144440699     | 0.49  | -   | -  | -   | SLC37A1 [23]   |
| BovineHD0200012097 | 2   | 41696846      | 0.79  | +   | +  | +   |                |
| BovineHD0200033645 | 2   | 116733758     | 0.49  | (+) | -  | -   |                |
| BovineHD0200035007 | 2   | 120723058     | 0.74  | +   | -  | -   |                |
| BovineHD0200035125 | 2   | 121128861     | 0.57  | -   | +  | +   |                |
| BovineHD0200036222 | 2   | 124656921     | 0.56  | +   | -  | -   |                |
| BovineHD0200037477 | 2   | 129028018     | 0.48  | (+) | +  | -   |                |
| BovineHD4100001819 | 3   | 7937124       | 0.58  | +   | -  | +   |                |
| BovineHD0300004800 | 3   | 14837576      | 0.64  | +   | -  | +   |                |
| BovineHD0300005092 | 3   | 15546316      | 1.00  | -   | -  | +   | SLC50A1 [39]   |
| BovineHD0300005121 | 3   | 15638565      | 0.61  | -   | +  | -   |                |
| BovineHD0300010269 | 3   | 32929783      | 0.51  | +   | +  | +   |                |
| BovineHD0300030794 | 3   | 107112873     | 0.44  | +   | +  | +   |                |
| BovineHD0300032672 | 3   | 113140396     | 0.63  | +   | -  | -   |                |
| BovineHD0400003444 | 4   | 11360411      | 0.81  | -   | +  | +   |                |
| BovineHD0400006694 | 4   | 22682241      | 0.47  | +   | -  | -   |                |
| BovineHD0400033443 | 4   | 115414057     | 0.49  | +   | -  | -   |                |
| BovineHD0500023925 | 5   | 84525667      | 0.60  | +   | +  | +   |                |
| BovineHD0500025181 | 5   | 88795885      | 0.54  | -   | -  | -   |                |
| BovineHD0500026635 | 5   | 93843392      | 0.47  | +   | -  | -   |                |
| BovineHD0500026645 | 5   | 93875727      | 0.60  | +   | -  | +   |                |
| BovineHD0500026860 | 5   | 94586978      | 0.80  | +   | -  | -   | MGST1 [26]     |
| BovineHD0500034287 | 5   | 118099483     | 0.60  | +   | +  | -   |                |
| BovineHD0500034328 | 5   | 118206134     | 0.46  | +   | -  | +   |                |
| BovineHD0600007970 | 6   | 28759913      | 0.69  | -   | -  | -   |                |
| BovineHD0600010605 | 6   | 38284780      | 0.46  | +   | -  | +   | ABCG2 [40]     |

|                    |    |           |      |     |   |     |            |
|--------------------|----|-----------|------|-----|---|-----|------------|
| BovineHD0600011060 | 6  | 40583958  | 0.73 | -   | + | (-) |            |
| BovineHD0700008359 | 7  | 29679398  | 0.47 | +   | + | +   |            |
| BovineHD0700029964 | 7  | 102574897 | 0.45 | -   | - | -   |            |
| BovineHD0900025344 | 9  | 89738098  | 1.00 | +   | - | -   |            |
| BovineHD1100022618 | 11 | 78888103  | 0.59 | -   | + | +   |            |
| BovineHD1100030073 | 11 | 103317601 | 0.60 | -   | + | +   | PAEP / LGB |
| BovineHD1200004660 | 12 | 15637232  | 0.59 | -   | - | -   |            |
| BovineHD1200009378 | 12 | 31866913  | 0.48 | (+) | + | (+) |            |
| BovineHD1200009963 | 12 | 33827073  | 0.47 | -   | + | +   |            |
| BovineHD1200019329 | 12 | 70293273  | 0.83 | -   | - | -   |            |
| BovineHD1200021971 | 12 | 77514314  | 0.48 | -   | + | -   |            |
| BovineHD1200022581 | 12 | 79220402  | 0.47 | -   | + | -   |            |
| BovineHD1200024310 | 12 | 83938103  | 0.48 | -   | - | -   |            |
| BovineHD1400000152 | 14 | 1439476   | 0.60 | +   | - | -   |            |
| BovineHD1400000216 | 14 | 1736599   | 0.80 | -   | + | +   |            |
| ARS-BFGL-NGS-4939  | 14 | 1801116   | 0.60 | +   | - | -   | DGAT1 [19] |
| ARS-BFGL-NGS-18365 | 14 | 2117455   | 0.60 | +   | - | -   |            |
| BovineHD1400000325 | 14 | 2264522   | 0.80 | -   | + | +   |            |
| BovineHD1400000482 | 14 | 2940147   | 0.60 | +   | - | -   |            |
| BovineHD1400000563 | 14 | 3195864   | 0.51 | +   | - | -   |            |
| BovineHD1400014375 | 14 | 50620705  | 0.60 | -   | + | -   |            |
| ARS-BFGL-NGS-94979 | 14 | 63946731  | 0.45 | +   | - | -   |            |
| BovineHD1400018384 | 14 | 65751278  | 0.45 | +   | - | (-) |            |
| BTB-01324160       | 16 | 1608132   | 0.66 | -   | + | -   |            |
| BovineHD1600011561 | 16 | 40910562  | 0.57 | (-) | - | +   |            |
| BovineHD1700018934 | 17 | 65757287  | 0.45 | -   | - | -   |            |
| BovineHD1700020108 | 17 | 68863608  | 0.80 | +   | - | -   |            |
| BovineHD1800006936 | 18 | 22568721  | 0.60 | +   | - | -   |            |
| ARS-BFGL-NGS-35499 | 18 | 50727653  | 0.49 | +   | - | -   |            |
| BovineHD1800016751 | 18 | 57508328  | 0.50 | +   | - | -   |            |
| BovineHD1800017015 | 18 | 58414597  | 0.60 | +   | - | -   |            |
| BovineHD1800017349 | 18 | 60019327  | 0.65 | +   | - | -   |            |
| BovineHD1900002660 | 19 | 9439368   | 0.48 | -   | - | -   |            |
| BovineHD1900006099 | 19 | 21189263  | 0.60 | +   | - | -   |            |
| BovineHD1900010587 | 19 | 36569291  | 0.44 | (+) | - | -   |            |
| BovineHD1900017409 | 19 | 60753539  | 0.45 | -   | + | +   |            |

|                        |    |           |      |     |     |     |                 |
|------------------------|----|-----------|------|-----|-----|-----|-----------------|
| BovineHD1900017548     | 19 | 61134515  | 0.48 | -   | -   | (+) | KCNJ2 (Fig. S2) |
| BovineHD2000001299     | 20 | 4035913   | 0.80 | +   | -   | -   |                 |
| BovineHD2000004455     | 20 | 14210526  | 0.46 | -   | -   | -   |                 |
| BovineHD2000008924     | 20 | 30616782  | 0.60 | +   | -   | +   |                 |
| BovineHD2000009067     | 20 | 31440760  | 0.50 | +   | -   | +   |                 |
| BovineHD2000009139     | 20 | 31683746  | 0.60 | +   | -   | +   | GHR [41]        |
| BovineHD2000009457     | 20 | 33027949  | 0.53 | +   | -   | +   |                 |
| BovineHD2000011122     | 20 | 39182594  | 0.57 | -   | -   | -   |                 |
| BovineHD2000016265     | 20 | 58530550  | 0.51 | +   | -   | +   |                 |
| BovineHD2100003508     | 21 | 13486454  | 0.48 | +   | -   | (+) |                 |
| BovineHD2100011339     | 21 | 39427041  | 0.45 | +   | -   | +   |                 |
| BovineHD2200009997     | 22 | 35026734  | 0.49 | -   | -   | -   |                 |
| BovineHD2200016044     | 22 | 56036171  | 0.54 | +   | -   | -   |                 |
| BovineHD2300008118     | 23 | 28679974  | 0.75 | -   | -   | -   |                 |
| BovineHD2300013060     | 23 | 45011198  | 0.46 | +   | +   | (-) |                 |
| BovineHD2300013065     | 23 | 45040309  | 0.45 | -   | -   | (+) |                 |
| BTB-02081535           | 23 | 52285248  | 0.64 | -   | +   | +   |                 |
| BovineHD2400005905     | 24 | 21838065  | 0.46 | -   | -   | -   |                 |
| BovineHD2400009809     | 24 | 35671115  | 0.54 | -   | +   | +   |                 |
| BovineHD2500010489     | 25 | 37750221  | 0.46 | +   | (+) | +   |                 |
| BovineHD2600004967     | 26 | 19098039  | 0.48 | -   | +   | +   |                 |
| ARS-BFGL-NGS-57448     | 27 | 36155097  | 0.78 | +   | -   | -   | GPAT4 [25]      |
| BovineHD2700011956     | 27 | 41283869  | 0.53 | -   | -   | +   |                 |
| BovineHD2700012081     | 27 | 41645455  | 0.55 | -   | -   | -   |                 |
| BTA-63683-no-rs        | 28 | 18663296  | 0.87 | -   | -   | -   |                 |
| Hapmap51965-BTA-101198 | 28 | 36314835  | 0.44 | -   | +   | +   |                 |
| BovineHD2800012748     | 28 | 44320344  | 0.55 | +   | +   | +   |                 |
| BovineHD2900010990     | 29 | 36306532  | 0.44 | +   | -   | +   |                 |
| ARS-BFGL-NGS-89746     | 29 | 49478288  | 0.60 | +   | -   | +   |                 |
| BovineHD3000002266     | X  | 6612143   | 0.60 | +   | +   | +   |                 |
| BovineHD3000007194     | X  | 22166972  | 0.60 | +   | -   | -   |                 |
| BovineHD3000015538     | X  | 53100212  | 0.55 | (+) | +   | -   |                 |
| ARS-BFGL-NGS-14575     | X  | 133958503 | 0.48 | -   | +   | (+) |                 |
| BovineHD3000040468     | X  | 140263353 | 0.44 | -   | -   | -   |                 |

#absolute SNP effects  $< 1 \times 10^{-3}$  are shown in brackets.

There are 4 QTL types:

| FY | MY | PY | Comment                                                                  |
|----|----|----|--------------------------------------------------------------------------|
| +  | +  | +  | Increase in milk volume, fat and protein yield                           |
| -  | +  | +  | Decrease in fat yield, increase in milk volume and protein yield         |
| +  | -  | +  | Increase in milk solids (fat and protein yield) and decrease milk volume |
| +  | +  | -  | Increase in milk volume and fat yield, decrease protein yield            |

## References

39. Kemper KE, Hayes BJ, Daetwyler HD, Goddard ME. How old are QTL and how widely do they segregate? *J Anim Breed Genet.* 2015;.132:121-34.
40. Cohen-Zinder M, Seroussi E, Larkin DM, Looor JJ, Everts-van der Wind A, Lee JH, et al. Identification of a missense mutation in the bovine ABCG2 gene with a major effect on the QTL on chromosome 6 affecting milk yield and composition in Holstein cattle. *Genome Res.* 2005; 15:936-44.
41. Blott S, Kim JJ, Moiso S, Schmidt-Kuntzel A, Cornet A, Berzi P, et al. Molecular dissection of a quantitative trait locus: a phenylalanine-to-tyrosine substitution in the transmembrane domain of the bovine growth hormone receptor is associated with a major effect on milk yield and composition. *Genetics.* 2003;163:253-66.
