# Supplementary material for: A multi-trait Bayesian method for mapping QTL and genomic prediction
Source: PubMed Central journal article supplement (PMC5866527; doi:10.1186/s12711-018-0377-y), 2018-03-24
Supplement: 12711_2018_377_MOESM6_ESM.pdf [file 12711_2018_377_MOESM6_ESM.pdf]

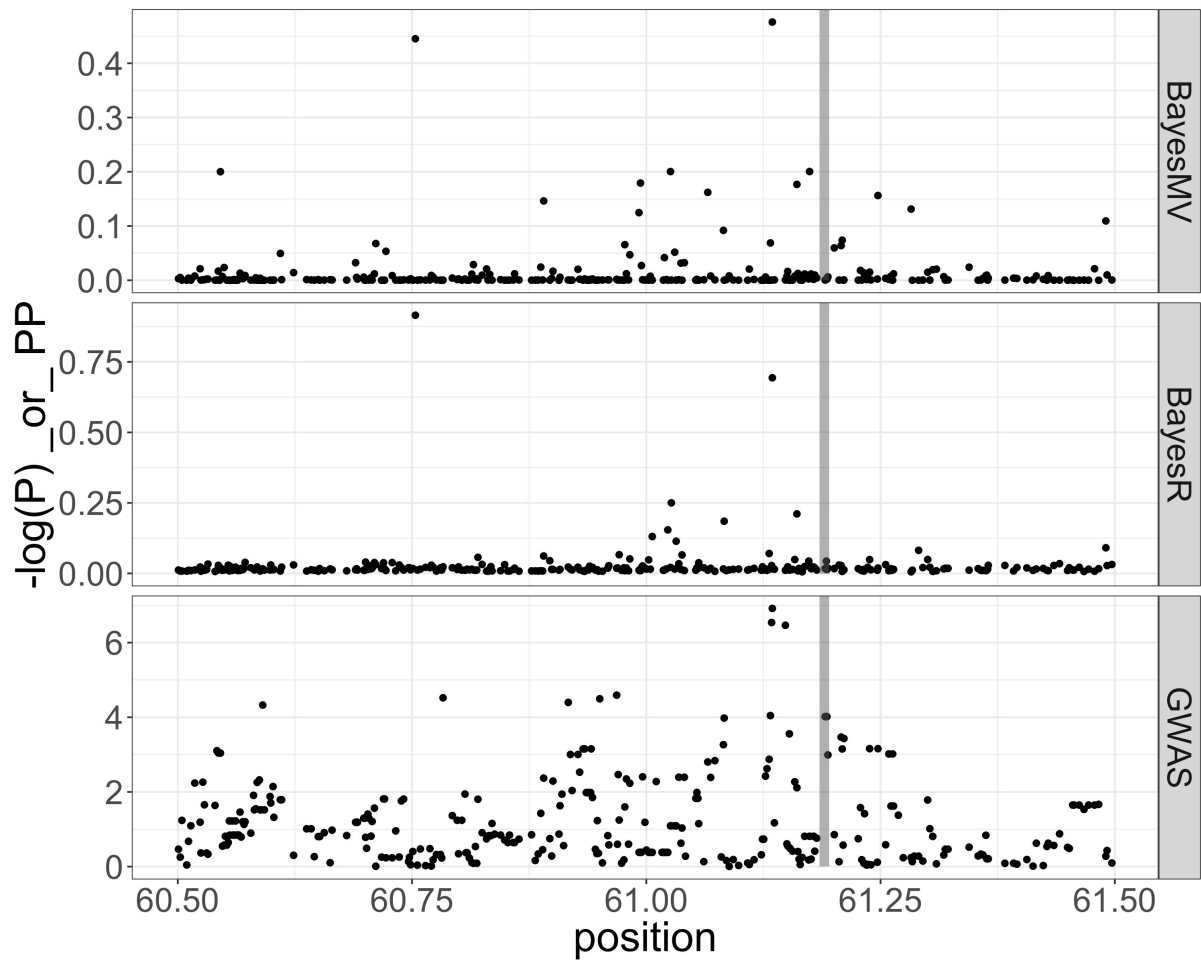

**Figure S2.** Mean posterior probability (PP) for BayesMV and BayesR, and the  $-\log_{10}(P)$  association test statistic between SNP and potassium (K) concentration on bovine chromosome 19 near the KCNJ2 gene (coding region highlighted in grey).
