# Supplementary material for: A multi-trait Bayesian method for mapping QTL and genomic prediction
Source: PubMed Central journal article supplement (PMC5866527; doi:10.1186/s12711-018-0377-y), 2018-03-24
Supplement: 12711_2018_377_MOESM7_ESM.pdf [file 12711_2018_377_MOESM7_ESM.pdf]

**Table S5.** Genomic prediction accuracy and bias for the relevant reference and validation datasets from univariate GBLUP analysis, data from Kemper et al. [1].

| Reference dataset | Validation dataset | Accuracy |      |      | Bias |      |      |
|-------------------|--------------------|----------|------|------|------|------|------|
|                   |                    | FY       | MY   | PY   | FY   | MY   | PY   |
| Holstein          | Holstein           | 0.60     | 0.58 | 0.59 | 1.18 | 0.89 | 1.06 |
| Hol_Jer           | Holstein           | 0.61     | 0.59 | 0.59 | 1.20 | 0.90 | 1.05 |
| Jersey            | Jersey             | 0.56     | 0.62 | 0.67 | 0.88 | 0.93 | 1.20 |
| Hol_Jer           | Jersey             | 0.58     | 0.64 | 0.69 | 0.88 | 0.91 | 1.17 |
| Hol_Jer           | Aust Red           | 0.17     | 0.11 | 0.04 | 0.75 | 0.32 | 0.16 |
