# Supplementary material for: A multi-trait Bayesian method for mapping QTL and genomic prediction
Source: PubMed Central journal article supplement (PMC5866527; doi:10.1186/s12711-018-0377-y), 2018-03-24
Supplement: 12711_2018_377_MOESM8_ESM.pdf [file 12711_2018_377_MOESM8_ESM.pdf]

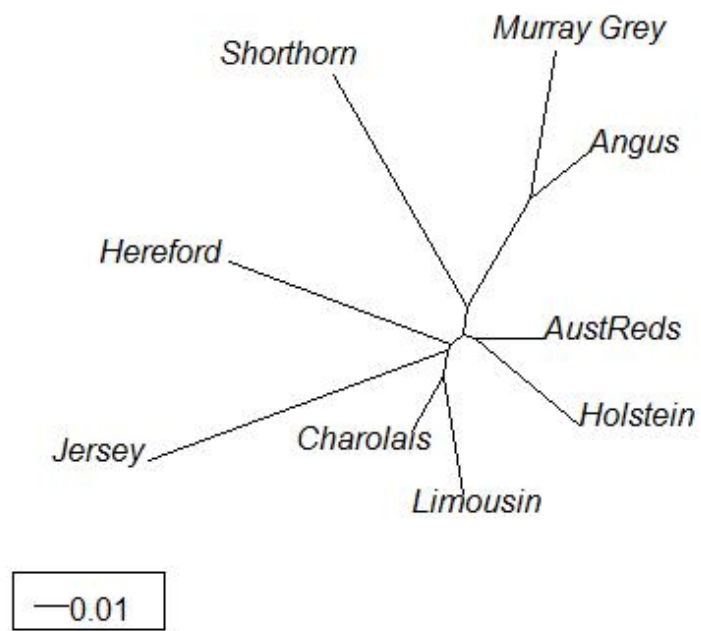

**Figure S3.** Genetic relationship between 9 dairy and beef cattle breeds. In current study, Holstein and Jersey dairy cattle are used in the reference population, and Australian Reds are used (exclusively) as a validation population.
